# Supplementary material
Source: PubMed Central journal article supplement (PMC5499186)
Supplement: 785FileS1.pdf [file 785FileS1.pdf]

**Table S1. Strain genotypes and constructions.**

| <b>Strain name</b> | <b>Genotype</b>                                                                                                                             | <b>Strain construction (reference)</b>                                                                                                                                                                                                                                                           |
|--------------------|---------------------------------------------------------------------------------------------------------------------------------------------|--------------------------------------------------------------------------------------------------------------------------------------------------------------------------------------------------------------------------------------------------------------------------------------------------|
| S1                 | <i>MATa gal2</i>                                                                                                                            | S288c background, Engel <i>et al.</i> , 2014                                                                                                                                                                                                                                                     |
| W303-1A            | <i>MATa leu2-3,112 his3-11,15 ura3-1 ade2-1 trp1-1 can1-100 RAD5</i>                                                                        | Thomas and Rothstein 1989                                                                                                                                                                                                                                                                        |
| YJM789             | <i>MATα lys2 gal2 ho::hisG</i>                                                                                                              | Wei <i>et al.</i> , 2007                                                                                                                                                                                                                                                                         |
| YJM790             | <i>MATa lys2 gal2</i>                                                                                                                       | John McCusker, Duke University                                                                                                                                                                                                                                                                   |
| JSC10-1            | <i>MATa leu2-3,112 his3-11,15 ura3-1 ade2-1 trp1-1 can1-100Δ::natMX4 RAD5</i>                                                               | W303-1A background, St. Charles and Petes 2013                                                                                                                                                                                                                                                   |
| JSC19-1            | <i>MATα ade2-1 ura3 gal2 ho::hisG can1Δ::natMX4</i>                                                                                         | YJM789 background, St. Charles and Petes 2013                                                                                                                                                                                                                                                    |
| YZ08               | <i>MATa gal2 V31539::kanMX4</i>                                                                                                             | S1 transformed with PCR fragment amplified from plasmid pFA6a-kanMX4 using primers V31539::DR F and V31539::DR R; insert <i>kanMX4</i> next to <i>CAN1</i>                                                                                                                                       |
| YZ10               | <i>MATa leu2-3,112 his3-11,15 ura3-1 ade2-1 trp1-1 can1-100Δ::natMX4 RAD5 VIII212140::hphMX4</i>                                            | JSC10-1 transformed with PCR fragment amplified from plasmid pAG32 using primers VIII212140::HYG F and VIII212140::HYG R; insert <i>hphMX4</i> at <i>VIII212140</i>                                                                                                                              |
| YZ15               | <i>MATa leu2-3,112 his3-11,15 ura3-1 ade2-1 trp1-1 can1-100Δ::natMX4 RAD5 VIII212140::hphMX4 VIII218090::CAN1-kanMX4</i>                    | YZ10 transformed with PCR fragment amplified from YZ08 using primers VIII218090::CAN1-KANMX F and VIII218090::CAN1-KANMX R; insert <i>CAN1-kanMX4</i> at <i>VIII218090</i>                                                                                                                       |
| YZ18-10            | <i>MATa leu2-3,112 his3-11,15 ura3-1 ade2-1 trp1-1 can1-100Δ::natMX4 RAD5 VIII212140::hphMX4, VIII214177::URA3, VIII218090::CAN1-kanMX4</i> | YZ15 transformed with PCR fragment amplified from S1 using primers VIII214177::URA3 F and VIII214177::URA3 R; insert <i>URA3</i> into one of the <i>CUP1</i> repeats at VIII214177; the <i>CUP1</i> repeat with <i>URA3</i> inserted was physically confirmed to be at the center of the cluster |
| YZ17               | <i>MATα ade2-1 ura3 gal2 ho::hisG can1Δ::natMX4</i>                                                                                         | A derivative of JSC19-1 with enhanced copper resistance; constructed by selecting 0.4 mM copper sulfate-resistant derivatives of JSC19-1 on SDC + 0.4 mM copper sulfate; the <i>CUP1</i> cluster in this strain is physically measured to be 30 kb                                               |
| YZ26               | <i>MATα leu2-3,112 his3-11,15 ura3-1 ade2-1 trp1-1 can1-100Δ::natMX4 RAD5</i>                                                               | A <i>MATα</i> derivative of JSC10-1; constructed by mating type switching of JSC10-1 using the plasmid pGAL-HO                                                                                                                                                                                   |
| YZ41               | <i>MATa leu2-3,112 his3-11,15 ura3-1 ade2-1 trp1-1 can1-100Δ::HIS3 RAD5 VIII212140::hphMX4, VIII214177::URA3, VIII218090::CAN1-kanMX4</i>   | YZ18-10 transformed with PCR fragment amplified from S1 using primers CAN1::HIS3 F and CAN1::HIS3 R; replace <i>can1-100Δ::natMX4</i> with <i>HIS3</i>                                                                                                                                           |
| YZ42               | <i>MATα leu2-3,112 his3-11,15 ura3-1 ade2-1 trp1-1 can1-100Δ::HIS3 RAD5</i>                                                                 | YZ26 transformed with PCR fragment amplified from S1 using primers CAN1::HIS3 F and CAN1::HIS3 R; replace <i>can1-100Δ::natMX4</i> with <i>HIS3</i>                                                                                                                                              |
| YZ43               | <i>MATa leu2-3,112 his3-11,15 ura3-1 ade2-1 trp1-1 can1-100Δ::HIS3 RAD5 VIII212140::hphMX4, VIII214177::URA3, VIII218090::CAN1-</i>         | YZ41 transformed with PCR fragment amplified from plasmid pAG25 using primers RAD52::NAT F and RAD52::NAT R; replace <i>RAD52</i> with <i>natMX4</i>                                                                                                                                             |

|      |                                                                                                                                                          |                                                                                                                                                      |
|------|----------------------------------------------------------------------------------------------------------------------------------------------------------|------------------------------------------------------------------------------------------------------------------------------------------------------|
|      | <i>kanMX4 rad52Δ::natMX4</i>                                                                                                                             |                                                                                                                                                      |
| YZ44 | <i>MATα leu2-3,112 his3-11,15 ura3-1 ade2-1 trp1-1 can1-100Δ::HIS3 RAD5 rad52Δ::natMX4</i>                                                               | YZ42 transformed with PCR fragment amplified from plasmid pAG25 using primers RAD52::NAT F and RAD52::NAT R; replace <i>RAD52</i> with <i>natMX4</i> |
| YZ45 | <i>MATα leu2-3,112 his3-11,15 ura3-1 ade2-1 trp1-1 can1-100Δ::HIS3 RAD5 VIII212140::hphMX4, VIII214177::URA3, VIII218090::CAN1-kanMX4 rad51Δ::natMX4</i> | YZ41 transformed with PCR fragment amplified from plasmid pAG25 using primers RAD51::NAT F and RAD51::NAT R; replace <i>RAD51</i> with <i>natMX4</i> |
| YZ46 | <i>MATα leu2-3,112 his3-11,15 ura3-1 ade2-1 trp1-1 can1-100Δ::HIS3 RAD5 rad51Δ::natMX4</i>                                                               | YZ42 transformed with PCR fragment amplified from plasmid pAG25 using primers RAD51::NAT F and RAD51::NAT R; replace <i>RAD51</i> with <i>natMX4</i> |
| YZ47 | <i>MATα leu2-3,112 his3-11,15 ura3-1 ade2-1 trp1-1 can1-100Δ::HIS3 RAD5 VIII212140::hphMX4, VIII214177::URA3, VIII218090::CAN1-kanMX4 mre11Δ::natMX4</i> | YZ41 transformed with PCR fragment amplified from plasmid pAG25 using primers MRE11::NAT F and MRE11::NAT R; replace <i>MRE11</i> with <i>natMX4</i> |
| YZ48 | <i>MATα leu2-3,112 his3-11,15 ura3-1 ade2-1 trp1-1 can1-100Δ::HIS3 RAD5 mre11Δ::natMX4</i>                                                               | YZ42 transformed with PCR fragment amplified from plasmid pAG25 using primers MRE11::NAT F and MRE11::NAT R; replace <i>MRE11</i> with <i>natMX4</i> |
| YZ49 | <i>MATα leu2-3,112 his3-11,15 ura3-1 ade2-1 trp1-1 can1-100Δ::HIS3 RAD5 VIII212140::hphMX4, VIII214177::URA3, VIII218090::CAN1-kanMX4 rad1Δ::natMX4</i>  | YZ41 transformed with PCR fragment amplified from plasmid pAG25 using primers RAD1::NAT F and RAD1::NAT R; replace <i>RAD1</i> with <i>natMX4</i>    |
| YZ50 | <i>MATα leu2-3,112 his3-11,15 ura3-1 ade2-1 trp1-1 can1-100Δ::HIS3 RAD5 rad1Δ::natMX4</i>                                                                | YZ42 transformed with PCR fragment amplified from plasmid pAG25 using primers RAD1::NAT F and RAD1::NAT R; replace <i>RAD1</i> with <i>natMX4</i>    |
| YZ51 | <i>MATα leu2-3,112 his3-11,15 ura3-1 ade2-1 trp1-1 can1-100Δ::HIS3 RAD5 VIII212140::hphMX4, VIII214177::URA3, VIII218090::CAN1-kanMX4 cup2Δ::natMX4</i>  | YZ41 transformed with PCR fragment amplified from plasmid pAG25 using primers CUP2::NAT F and CUP2::NAT R; replace <i>CUP2</i> with <i>natMX4</i>    |
| YZ52 | <i>MATα leu2-3,112 his3-11,15 ura3-1 ade2-1 trp1-1 can1-100Δ::HIS3 RAD5 cup2Δ::natMX4</i>                                                                | YZ42 transformed with PCR fragment amplified from plasmid pAG25 using primers CUP2::NAT F and CUP2::NAT R; replace <i>CUP2</i> with <i>natMX4</i>    |
| YZ60 | <i>MATα leu2-3,112 his3-11,15 ura3-1 ade2-1 can1-100Δ::HIS3 RAD5</i>                                                                                     | YZ42 transformed with PCR fragment amplified from S1 using primers IV461633 F and IV462765 R; replace <i>trp1-1</i> with <i>TRP1</i>                 |
| HB1  | <i>MATα leu2-3,112 his3-11,15 ura3-1 ade2-1 trp1-1 can1-100Δ::HIS3 VIII212140::hphMX4, VIII214177::URA3, VIII218090::CAN1-kanMX4 rad5Δ::natMX4</i>       | YZ41 transformed with PCR fragment amplified from plasmid pAG25 using primers RAD5::NAT F and RAD5::NAT R; replace <i>RAD5</i> with <i>natMX4</i>    |
| HB3  | <i>MATα leu2-3,112 his3-11,15 ura3-1 ade2-1 trp1-1 can1-100Δ::HIS3 rad5Δ::natMX4</i>                                                                     | YZ42 transformed with PCR fragment amplified from plasmid pAG25 using primers RAD5::NAT F and RAD5::NAT R; replace <i>RAD5</i> with <i>natMX4</i>    |
| HB5  | <i>MATα leu2-3,112 his3-11,15 ura3-1</i>                                                                                                                 | YZ41 transformed with PCR fragment amplified                                                                                                         |

|       |                                                                                                                                                                                                                                                                              |                                                                                                                                                   |
|-------|------------------------------------------------------------------------------------------------------------------------------------------------------------------------------------------------------------------------------------------------------------------------------|---------------------------------------------------------------------------------------------------------------------------------------------------|
|       | <i>ade2-1 trp1-1 can1-100Δ::HIS3 RAD5 VIII212140::hphMX4, VIII214177::URA3, VIII218090::CAN1-kanMX4 mms2Δ::natMX4</i>                                                                                                                                                        | from plasmid pAG25 using primers MMS2::NAT F and MMS2::NAT R; replace <i>MMS2</i> with <i>natMX4</i>                                              |
| HB7   | <i>MATα leu2-3,112 his3-11,15 ura3-1 ade2-1 trp1-1 can1-100Δ::HIS3 RAD5 mms2Δ::natMX4</i>                                                                                                                                                                                    | YZ42 transformed with PCR fragment amplified from plasmid pAG25 using primers MMS2::NAT F and MMS2::NAT R; replace <i>MMS2</i> with <i>natMX4</i> |
| YZ103 | <i>MATα/MATα leu2-3,112/leu2-3,112 his3-11,15/his3-11,15 ura3-1/ura3-1 ade2-1/ade2-1 trp1-1/trp1-1 can1-100Δ::natMX4/can1-100Δ::natMX4 RAD5/RAD5 VIII212140::hphMX4/VIII212140 VIII214177::URA3/VIII214177 VIII218090::CAN1-kanMX4/VIII218090</i>                            | YZ18-10 x YZ26                                                                                                                                    |
| YZ104 | <i>MATα/MATα HO/ ho::hisG leu2-3,112/LEU2 his3-11,15/HIS3 ura3-1/ura3 ade2-1/ade2-1 trp1-1/TRP1 can1-100Δ::natMX4/can1Δ::natMX4 RAD5/RAD5 VIII212140::hphMX4/VIII212140 VIII214177::URA3/VIII214177 VIII218090::CAN1-kanMX4/VIII218090</i>                                   | YZ18-10 x YZ17                                                                                                                                    |
| YZ113 | <i>MATα/MATα leu2-3,112/leu2-3,112 his3-11,15/his3-11,15 ura3-1/ura3-1 ade2-1/ade2-1 trp1-1/trp1-1 can1-100Δ::HIS3/can1-100Δ::HIS3 RAD5/RAD5 VIII212140::hphMX4/VIII212140 VIII214177::URA3/VIII214177 VIII218090::can1-kanMX4/VIII218090 rad52Δ::natMX4/ rad52Δ::natMX4</i> | YZ43 x YZ44                                                                                                                                       |
| YZ114 | <i>MATα/MATα leu2-3,112/leu2-3,112 his3-11,15/his3-11,15 ura3-1/ura3-1 ade2-1/ade2-1 trp1-1/trp1-1 can1-100Δ::HIS3/can1-100Δ::HIS3 RAD5/RAD5 VIII212140::hphMX4/VIII212140 VIII214177::URA3/VIII214177 VIII218090::CAN1-kanMX4/VIII218090 rad51Δ::natMX4/ rad51Δ::natMX4</i> | YZ45 x YZ46                                                                                                                                       |
| YZ115 | <i>MATα/MATα leu2-3,112/leu2-3,112 his3-11,15/his3-11,15 ura3-1/ura3-1 ade2-1/ade2-1 trp1-1/trp1-1 can1-100Δ::HIS3/can1-100Δ::HIS3 RAD5/RAD5 VIII212140::hphMX4/VIII212140 VIII214177::URA3/VIII214177 VIII218090::CAN1-kanMX4/VIII218090 mre11Δ::natMX4/ mre11Δ::natMX4</i> | YZ47 x YZ48                                                                                                                                       |
| YZ116 | <i>MATα/MATα leu2-3,112/leu2-3,112 his3-11,15/his3-11,15 ura3-1/ura3-1 ade2-1/ade2-1 trp1-1/trp1-1 can1-100Δ::HIS3/can1-100Δ::HIS3</i>                                                                                                                                       | YZ49 x YZ50                                                                                                                                       |

|       |                                                                                                                                                                                                                                                                                                                                                                                                       |                                              |
|-------|-------------------------------------------------------------------------------------------------------------------------------------------------------------------------------------------------------------------------------------------------------------------------------------------------------------------------------------------------------------------------------------------------------|----------------------------------------------|
|       | <p><i>RAD5/RAD5</i><br/> <i>VIII212140::hphMX4/VIII212140</i><br/> <i>VIII214177::URA3/VIII214177</i><br/> <i>VIII218090::CAN1-kanMX4/VIII218090</i><br/> <i>rad1Δ::natMX4/rad1Δ::natMX4</i></p>                                                                                                                                                                                                      |                                              |
| HB9   | <p><i>MATa/MATα leu2-3,112/leu2-3,112</i><br/> <i>his3-11,15/his3-11,15 ura3-1/ura3-1</i><br/> <i>ade2-1/ade2-1 trp1-1/trp1-1 can1-100Δ::HIS3/can1-100Δ::HIS3</i><br/> <i>VIII212140::hphMX4/VIII212140</i><br/> <i>VIII214177::URA3/VIII214177</i><br/> <i>VIII218090::CAN1-kanMX4/VIII218090</i><br/> <i>rad5Δ::natMX4/rad5Δ::natMX4</i></p>                                                        | HB1 x HB3                                    |
| HB13  | <p><i>MATa/MATα leu2-3,112/leu2-3,112</i><br/> <i>his3-11,15/his3-11,15 ura3-1/ura3-1</i><br/> <i>ade2-1/ade2-1 trp1-1/trp1-1 can1-100Δ::HIS3/can1-100Δ::HIS3</i><br/> <i>RAD5/RAD5</i><br/> <i>VIII212140::hphMX4/VIII212140</i><br/> <i>VIII214177::URA3/VIII214177</i><br/> <i>VIII218090::CAN1-kanMX4/VIII218090</i><br/> <i>mms2Δ::natMX4/mms2Δ::natMX4</i></p>                                  | HB5 x HB7                                    |
| YZ117 | <p><i>MATa/MATα leu2-3,112/leu2-3,112</i><br/> <i>his3-11,15/his3-11,15 ura3-1/ura3-1</i><br/> <i>ade2-1/ade2-1 trp1-1/trp1-1 can1-100Δ::HIS3/can1-100Δ::HIS3</i><br/> <i>RAD5/RAD5</i><br/> <i>VIII212140::hphMX4/VIII212140</i><br/> <i>VIII214177::URA3/VIII214177</i><br/> <i>VIII218090::CAN1-kanMX4/VIII218090</i><br/> <i>cup2Δ::natMX4/cup2Δ::natMX4</i></p>                                  | YZ51 x YZ52                                  |
| YZ118 | <p><i>MATa/MATα leu2-3,112/leu2-3,112</i><br/> <i>his3-11,15/his3-11,15 ura3-1/ura3-1</i><br/> <i>ade2-1/ade2-1 trp1-1/trp1-1 can1-100Δ::HIS3/can1-100Δ::HIS3</i><br/> <i>RAD5/RAD5</i><br/> <i>VIII212140::hphMX4/VIII212140</i><br/> <i>VIII214177::URA3/VIII214177</i><br/> <i>VIII218090::CAN1-kanMX4/VIII218090</i><br/> <i>cup2Δ::natMX4/cup2Δ::natMX4</i><br/> with plasmid p425-GPD-CUP1.</p> | YZ117 transformed with plasmid p425-GPD-CUP1 |
| MD692 | <p><i>MATa/MATα leu2-3,112/leu2-3,112</i><br/> <i>his3-11,15/his3-11,15 ura3-1/ura3-1</i><br/> <i>ade2-1/ade2-1 trp1-1/TRP1 can1-100Δ::natMX4/can1-100Δ::HIS3</i><br/> <i>RAD5/RAD5</i><br/> <i>VIII212140::hphMX4/VIII212140</i><br/> <i>VIII214177::URA3/VIII214177</i><br/> <i>VIII218090::CAN1-kanMX4/VIII218090</i></p>                                                                          | YZ18-10 x YZ60                               |

**Table S2. PCR primer names and sequences used in strain constructions and analysis.**

| <b>Primer name</b>       | <b>Sequence (5' to 3')</b>                                                                         | <b>Strain constructed /analyzed</b>                                                        |
|--------------------------|----------------------------------------------------------------------------------------------------|--------------------------------------------------------------------------------------------|
| V31539::DR F             | AGGTCTGAAGGAGTTTTCAAATGCTTCTACTC<br>CGTCTGCTTTCTTTTCGGGACGTACGCTGC<br>AGGTCTGAC                    | YZ08 (insert <i>kanMX4</i> into S1 at V31539)                                              |
| V31539::DR R             | CTATAATCTCAGTATATTTATTTTTATCGATG<br>ATTCACCAACAATCTTGCTATCGATGAATTC<br>GAGCTCG                     | YZ08 (insert <i>kanMX4</i> into S1 at V31539)                                              |
| EXT V31539 F             | TGGTTCTAGGTTTCGGGTGACG                                                                             | YZ08 (confirm V31539:: <i>kanMX4</i> insertion)                                            |
| EXT V31539 R             | CACATTTCCACGCCATTTTCG                                                                              | YZ08 (confirm V31539:: <i>kanMX4</i> insertion)                                            |
| VIII212140::HY G F       | ATATATGTTTGAAGTGTATATTAATAAATAAAG<br>TCATTATTTGAATATTGGTTTCTCGGTCTAAG<br>AGCTTACGTACGCTGCAGGTCTGAC | YZ10 (insert <i>hphMX4</i> into JSC10-1 at VIII212140)                                     |
| VIII212140::HY G R       | TGTTATCCCCGTCACTTTCAATGATCTATTTA<br>TTTGAAGCGGATAGTACAACAGATCAGTCTA<br>AAACGTAATCGATGAATTCGAGCTCG  | YZ10 (insert <i>hphMX4</i> into JSC10-1 at VIII212140)                                     |
| EXT VIII211913 F         | AGATCTTCTAGCGAGCTTG                                                                                | YZ10 (confirm VIII212140:: <i>hphMX4</i> insertion)                                        |
| HYG INT R                | CCTCCTACATCGAAGCTG                                                                                 | YZ10 (confirm VIII212140:: <i>hphMX4</i> insertion)                                        |
| VIII218090::CAN1-KANMX F | TTATATTCAAATGATATGATTTCCCAATTA<br>ATACTTGCTGTTGCATTTTGAATCGGATGTA<br>ACTGGGACGTACGCTGCAGGTCTGAC    | YZ15 (insert <i>CAN1-kanMX4</i> into YZ10 at VIII218090)                                   |
| VIII218090::CAN1-KANMX R | TAGAGAACGTGGGAACAGTTCCGCACTGTG<br>ACCACCGGAACGTACGTCTGGTTAGCGCAG<br>CATTAGCGAACTTGAAGAATAACCAAGGTC | YZ15 (insert <i>CAN1-kanMX4</i> into YZ10 at VIII218090)                                   |
| EXT VIII217877 F         | CAACGACAATGCTCCTCTCATAA                                                                            | YZ15 (confirm VIII218090:: <i>CAN1-kanMX4</i> insertion)                                   |
| CAN1 INT R               | GGTGTTAGCTTTGCTGCCG                                                                                | YZ15 (confirm VIII218090:: <i>CAN1-kanMX4</i> insertion)                                   |
| VIII214177::UR A3 F      | GCAAGTAGAAAGGAACACCTTGCAGAATATT<br>TATCAATTTTGTCTGCGTTTCCAGTAATTTTA<br>AATCGTTAATGTGGCTGTGGTTTCAGG | YZ18 (insert <i>URA3</i> into YZ15 at VIII214177)                                          |
| VIII214177::UR A3 R      | GGTACCCGCTGCTGAAAACCTATCTCCGAT<br>ACCTGCCTCTATTGATACGAACGACATTCCT<br>TTAATTGCTAGATTCCCGGGTAATAACTG | YZ18 (insert <i>URA3</i> into YZ15 at VIII214177)                                          |
| VIII214038 F             | AAGTCTACTGTATTACTCACGCC                                                                            | YZ18 (confirm VIII214177:: <i>URA3</i> insertion)                                          |
| URA3 INT R (V116511 R)   | CCATTCTGCTATTCTGTATACACC                                                                           | YZ18 (confirm VIII214177:: <i>URA3</i> insertion)                                          |
| CAN1:: <i>HIS3</i> F     | ATTAGTATTAGCGTGAAAATGTACACATATA<br>CATATATATATATATATATACTTGAAGG<br>TCTGAAGGACTAGCATGTACGTGAGCG     | YZ41/YZ42 (use <i>HIS3</i> to replace <i>CAN1</i> at its endogenous locus in YZ18-10/YZ26) |
| CAN1:: <i>HIS3</i> R     | CAGCAAAGGCCACAGAACCGTATTCATGTT<br>ACTTCTGCAATATCAATCACTTACTGGCAAG<br>TGCGTATATACCACTTGCCACCTATCACC | YZ41/YZ42 (use <i>HIS3</i> to replace <i>CAN1</i> at its endogenous locus in YZ18-10/YZ26) |
| <i>HIS3</i> INT R        | GACTTCCCTGACTAATGCCG                                                                               | YZ41/YZ42 (confirm <i>can1</i> $\Delta$ :: <i>HIS3</i> replacement, use with primer EXT)   |

|                          |                                                                                                       |                                                                                                       |
|--------------------------|-------------------------------------------------------------------------------------------------------|-------------------------------------------------------------------------------------------------------|
|                          |                                                                                                       | V31539 F)                                                                                             |
| RAD52::NAT F             | ATATAGGAAGAAATACAAATAAAATCAGAAT<br>TGAAAGAGTAAGTACTAGAGGATTTTGGAGTAAT<br>AAATAATGATCGTACGCTGCAGGTCGAC | YZ43/YZ44 (use <i>natMX4</i> to<br>replace <i>RAD52</i> at its endogenous<br>locus in YZ41/YZ42)      |
| RAD52::NAT R             | ATGGAAATGAAGATAAAAATGTACGGAACG<br>CAACCTAAGAAAAAGAGGAGAATTGAAAGTA<br>AACCTGTGTAATCGATGAATTCGAGCTCG    | YZ43/YZ44 (use <i>natMX4</i> to<br>replace <i>RAD52</i> at its endogenous<br>locus in YZ41/YZ42)      |
| XIII212091 F<br>(RAD52)  | GTTGGGAATGGATAGGTCCGA                                                                                 | YZ43/YZ44 (use with INT NAT R<br>to confirm <i>rad52Δ::natMX4</i><br>replacement)                     |
| INT NAT R<br>(AMC067)    | CCGGTAAGCCGTGTCGTC                                                                                    | YZ43/YZ44/YZ45/YZ46/YZ47/YZ<br>48/YZ49/YZ50/YZ51/YZ52 (to<br>confirm the existence of <i>natMX4</i> ) |
| INT RAD52 R              | TGGGAATCAAGTACCGCGT                                                                                   | YZ43/YZ44 (use with XIII212091<br>F to confirm the deletion of<br><i>RAD52</i> )                      |
| RAD51::NAT F             | CTTCTTCTATCTTCCGTAGTTTCCATATACTA<br>GTAGTTGAGTGTAGCGACAAAGAGCAGACG<br>TAGTTATTTG CGTACGCTGCAGGTCGAC   | YZ45/YZ46 (use <i>natMX4</i> to<br>replace <i>RAD51</i> at its endogenous<br>locus in YZ41/YZ42)      |
| RAD51::NAT R             | ATGGAAATGAAGATAAAAATGTACGGAACG<br>CAACCTAAGAAAAAGAGGAGAATTGAAAGTA<br>AACCTGTGTAATCGATGAATTCGAGCTCG    | YZ45/YZ46 (use <i>natMX4</i> to<br>replace <i>RAD51</i> at its endogenous<br>locus in YZ41/YZ42)      |
| V349750 F<br>(RAD51)     | GACTAGGCCACACTTCGTTAC                                                                                 | YZ45/YZ46 (use with INT NAT R<br>to confirm <i>rad51Δ::natMX4</i><br>replacement)                     |
| INT RAD51 R              | CTATGGATACCAATCTTACCGG                                                                                | YZ45/YZ46 (use with V349750 F<br>to confirm the deletion of <i>RAD51</i> )                            |
| MRE11::NAT F             | TCATGAATTTAGAATGCAAATTTGCTCCTCT<br>CAAATGGCATACTTGTGTTTCGCGAAGG<br>CAAGCCCTTGGCGTACGCTGCAGGTCGAC      | YZ47/YZ48 (use <i>natMX4</i> to<br>replace <i>MRE11</i> at its endogenous<br>locus in YZ41/YZ42)      |
| MRE11::NAT R             | TGGAACAACATTAAGAGAATGCAGACAATT<br>GACGCAAGTTGTACCTGCTCAGATCCGATA<br>AAACTCGACTATCGATGAATTCGAGCTCG     | YZ47/YZ48 (use <i>natMX4</i> to<br>replace <i>MRE11</i> at its endogenous<br>locus in YZ41/YZ42)      |
| MMS2::NAT F              | GAAATTCTTATTCTGTATATGCAACGTAGAA<br>GAAAGCAGCGTTTACACAAAACGTACGCTG<br>CAGGTCGAC                        | HB5/HB7 (use <i>natMX4</i> to replace<br><i>MMS2</i> at its endogenous locus in<br>YZ41/YZ42)         |
| MMS2::NAT R              | GTATATATGAGTGGCTTGGAAATGCTGCAAT<br>ACTGTTTAGGAAAAAGTAGATAAATGGATGA<br>ATTCGAGCTCG                     | HB5/HB7 (use <i>natMX4</i> to replace<br><i>MMS2</i> at its endogenous locus in<br>YZ41/YZ42)         |
| MMS2-forward             | AAGATCAACTTCCTACACAATCT                                                                               | Used to confirm deletion of <i>MMS2</i>                                                               |
| MMS2-reverse             | AAGGTGTGGAAGTCAGTTTGG                                                                                 | Used to confirm deletion of <i>MMS2</i>                                                               |
| RAD5::NAT F              | CATTATCAAAAGGCCTTAGAAACACACCTAA<br>AGTCTTACAGTATCACAAATCGTACGCTGCAG<br>GTCGAC                         | HB1/HB3 (use <i>natMX4</i> to replace<br><i>RAD5</i> at its endogenous locus in<br>YZ41/YZ42)         |
| RAD5::NAT R              | GGTTGAAAATAATAATAAATAAAGTCTTTATA<br>TATGAGTATGTGGTATGAATCGATGAATTCG<br>AGCTCG                         | HB1/HB3 (use <i>natMX4</i> to replace<br><i>RAD5</i> at its endogenous locus in<br>YZ41/YZ42)         |
| RAD5-forward             | CTGCTAAGCGCATTGCTCACTTCAAAG                                                                           | Used to confirm deletion of <i>RAD5</i>                                                               |
| RAD5-reverse             | GGACAAGGTTGAATTTGAGGTATC                                                                              | Used to confirm deletion of <i>RAD5</i>                                                               |
| XIII718186 F<br>(MRE11 ) | CATATTCCTATCACAGTTAACGC                                                                               | YZ47/YZ48 (use with INT NAT R<br>to confirm <i>mre11Δ::natMX4</i><br>replacement)                     |
| INT MRE11 R              | AGACATGGTTGTACAGTCCGG                                                                                 | YZ47/YZ48 (use with XIII718186<br>F to confirm the deletion of<br><i>MRE11</i> )                      |

|                          |                                                                                                    |                                                                                           |
|--------------------------|----------------------------------------------------------------------------------------------------|-------------------------------------------------------------------------------------------|
| RAD1::NAT F (AMC050)     | GAGAGAGCACAGGTGTACTGGAGGGTTTCAG<br>GACGTTGGTAGAGCATTGGCCGTACGCTGC<br>AGGTCGAC                      | YZ49/YZ50 (use <i>natMX4</i> to replace <i>RAD1</i> at its endogenous locus in YZ41/YZ42) |
| RAD1::NAT R (AMC051)     | AAGATTCAAAGAGCATGTCTAACTTATAACA<br>TATACGGTCTGAAGTACCAATCGATGAATTC<br>GAGCTCG                      | YZ49/YZ50 (use <i>natMX4</i> to replace <i>RAD1</i> at its endogenous locus in YZ41/YZ42) |
| AMC052                   | AGTAAGCTATAGCCACAG                                                                                 | YZ49/YZ50 (use with INT NAT R to confirm <i>rad1Δ::natMX4</i> replacement)                |
| INT RAD1 R (AMC053)      | TAACACTGCATCGTCATC                                                                                 | YZ49/YZ50 (use with AMC052 to confirm the deletion of <i>RAD1</i> )                       |
| CUP2::NAT F              | GTAAGTATTAAGCTGTGGACGAAATAGCAGT<br>AGCCATGGCGATGTAATTTATTAGACGGCG<br>GCTTGATAAAACGTACGCTGCAGGTCGAC | YZ51/YZ52 (use <i>natMX4</i> to replace <i>CUP2</i> at its endogenous locus in YZ41/YZ42) |
| CUP2::NAT R              | ATCTCGGCCCGACTGCCAGCTTGCCGGGA<br>GAACAAACAACCGCCAATATATGTATATGTA<br>TATTTATATAGATCGATGAATTCGAGCTCG | YZ51/YZ52 (use <i>natMX4</i> to replace <i>CUP2</i> at its endogenous locus in YZ41/YZ42) |
| VII190919 F (CUP2)       | CCTTCCACCACTACGATCG                                                                                | YZ51/YZ52 (use with INT NAT R to confirm <i>cup2Δ::natMX4</i> replacement)                |
| INT CUP2 R               | GAGCGACCATTTAGGCC                                                                                  | YZ51/YZ52 (use with VII190919 F to confirm the deletion of <i>CUP2</i> )                  |
| CUP1 amp5                | CGAGATGAAATGAATAGCAACGG                                                                            | Synthesize DIG probes that hybridize to both 2.0 kb and 1.2 kb <i>CUP1</i> repeats        |
| CUP1 amp3                | TTCATTTCCAGAGCAGCATGAC                                                                             | Synthesize DIG probes that hybridize to both 2.0 kb and 1.2 kb <i>CUP1</i> repeats        |
| CUP1 amp5*               | G TTCAGCGAATTAATTA ACTTCC                                                                          | Primer to prepare probe to detect Ylp5- <i>CUP1</i> plasmid                               |
| CUP1 amp3*               | CATTTCCAGAGCAGCATGAC                                                                               | Primer to prepare probe to detect Ylp5- <i>CUP1</i> plasmid                               |
| bla-F                    | ATGCTTAATCAGTGAGGCACC                                                                              | Primer to prepare probe to detect vector sequences                                        |
| bla-R                    | ATTCAACATTTCCGTGTCGCC                                                                              | Primer to prepare probe to detect vector sequences                                        |
| CUP1 W303 spec amp5      | AGATTCTGTT CAGTTCACTAACGG                                                                          | Synthesize DIG probes that hybridize specifically to the 2.0 kb <i>CUP1</i> repeats       |
| CUP1 W303 spec amp3      | GTTCAAACGAATCCTCTTTGTCC                                                                            | Synthesize DIG probes that hybridize specifically to the 2.0 kb <i>CUP1</i> repeats       |
| IV461633 F               | CAGTTATGACGCCAGATGGC                                                                               | YZ60 (replace <i>trp1-1</i> with <i>TRP1</i> )                                            |
| IV462765 R               | TCATTGTAGCGTATGCGCC                                                                                | YZ60 (replace <i>trp1-1</i> with <i>TRP1</i> )                                            |
| IV461811 F               | CGTGATTAAGCACACAAAGGC                                                                              | YZ60 (use with IV462578 R to confirm that <i>trp1-1</i> was replaced by <i>TRP1</i> )     |
| IV462578 R               | TTTCAAAGGCCTGCAGGC                                                                                 | YZ60 (use with IV461811 F to confirm that <i>trp1-1</i> was replaced by <i>TRP1</i> )     |
| HindIII-CUP1 stop ligate | TCGAGGTCGACGGTATCGATAAGCTTTCA<br>TTTCCAGAGCAGCA                                                    | p425-GPD-CUP1 construction                                                                |
| CUP1 start-BamHI ligate  | GTGGATCCCCCGGGCTGCAGGAATTCAT<br>G TTCAGCGAATTAATTA ACTTC                                           | p425-GPD-CUP1 construction                                                                |

|               |                         |                                                     |
|---------------|-------------------------|-----------------------------------------------------|
| VIII 108799-F | ACAGTTCTTAAGTATGACGCG   | Primer used to detect LOH at <i>CEN8</i>            |
| VIII 109229-R | AACCACTCACCAACCTTCTCC   | Primer used to detect LOH at <i>CEN8</i>            |
| F1            | CATTGGCACTCATGACCTTCA   | Primer used to detect inter-homolog gene conversion |
| R1'           | ATTCATGTAGCTGCCCAACGG   | Primer used to detect inter-homolog gene conversion |
| 2172R         | GCGGATAGTACAACAGATCAGTC | Primer used to detect inter-homolog gene conversion |
| 4038F         | AGTCTACTGTATTACTCACGCC  | Primer used to detect inter-homolog gene conversion |



**Table S3. Plasmids used in this study.**

| <b>Plasmid name</b> | <b>Relevant features</b>                                       | <b>Source</b>                |
|---------------------|----------------------------------------------------------------|------------------------------|
| pFA6a – kanMX4      | <i>kanMX4</i>                                                  | Wach <i>et al.</i> , 1994    |
| pAG25               | <i>natMX4</i>                                                  | Goldstein and McCusker, 1999 |
| pAG32               | <i>hphMX4</i>                                                  | Goldstein and McCusker, 1999 |
| pGAL-HO             | Galactose-regulated HO gene                                    | Herskowitz and Jensen, 1991  |
| p425-GPD-CUP1       | <i>CUP1</i> gene regulated by <i>GPD</i> promoter; <i>LEU2</i> | Constructed in this study    |
| Ylp5- <i>CUP1</i>   | <i>CUP1</i> repeat cloned in Ylp5 vector; <i>URA3</i>          | Constructed in this study    |

### A. PCR with primers F1 and R1'

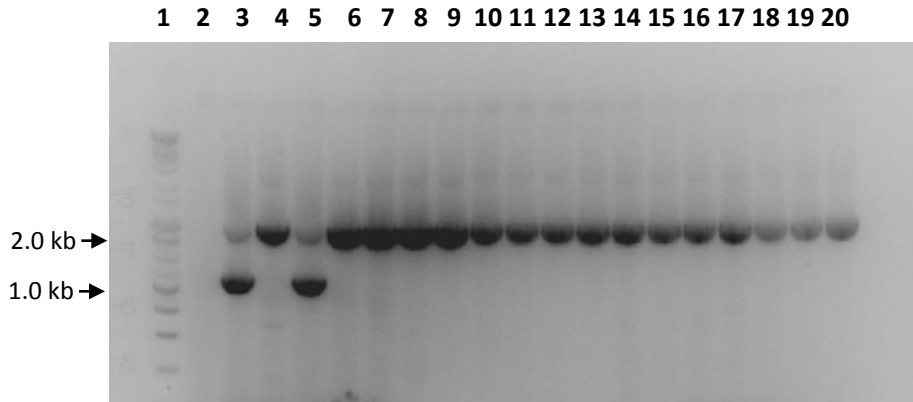

### B. PCR with primers 4038F and 2172R

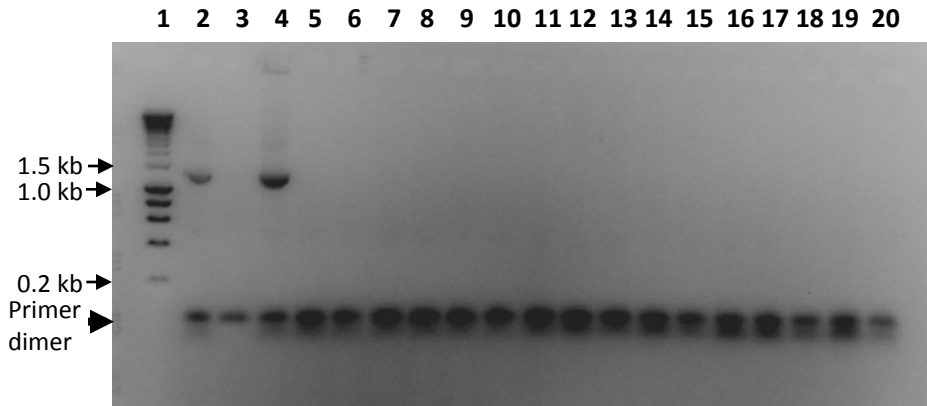

**Figure S1. PCR analysis of inter-homolog gene conversion.** As discussed in the main text, inter-homolog gene conversion would be expected to produce a *CUP1* array with a mixture of 2 kb *CUP1* repeats (derived from W303-1A) and 1.2 kb repeats (derived from YJM789). **A.** Using primers F1 and R1' (shown in Fig. 4), we amplified DNA from spores derived from the strain with the putative gene conversion event. These primers result in bands that are the same size as the *CUP1* repeats. Lane 1 contains the HyperLadder I (Bioline), Lanes 3 and 4 contain DNA from a control spore in which we selected for recombination between *CUP1* clusters on the two homologs, Lane 4 has DNA from S288c, a strain with the same *CUP1* repeats as W303-1A, and Lanes 6-20 have DNA derived from independent putative gene conversion events; none have a mixture of the two types of repeats. **B.** PCR analysis using primers 4038F and 2172R (Fig. 4). These primers produce a 1.2 kb fragment only if there is a mixture of two types of repeats in the spore DNA samples. Such a fragment was produced only in the control samples (Lanes 3 and 5). Lane 1 has the size ladder, and Lane 3 has S288c DNA. Lanes 5-20 have samples from independent putative conversion events. The samples in Lanes 5-19 are the same as in Lanes 6-20 of Fig. S1A. The band below 200 bp in all samples is likely to represent primer dimers.

### A. *Hind*III digest

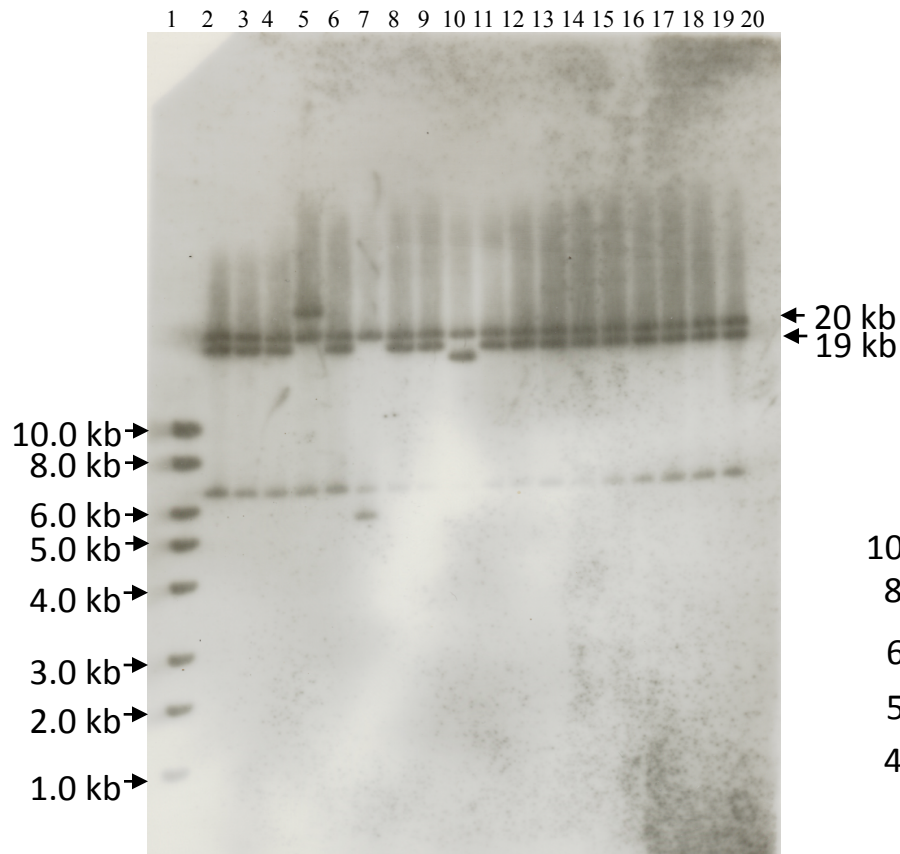

### B. *Eco*RI digest

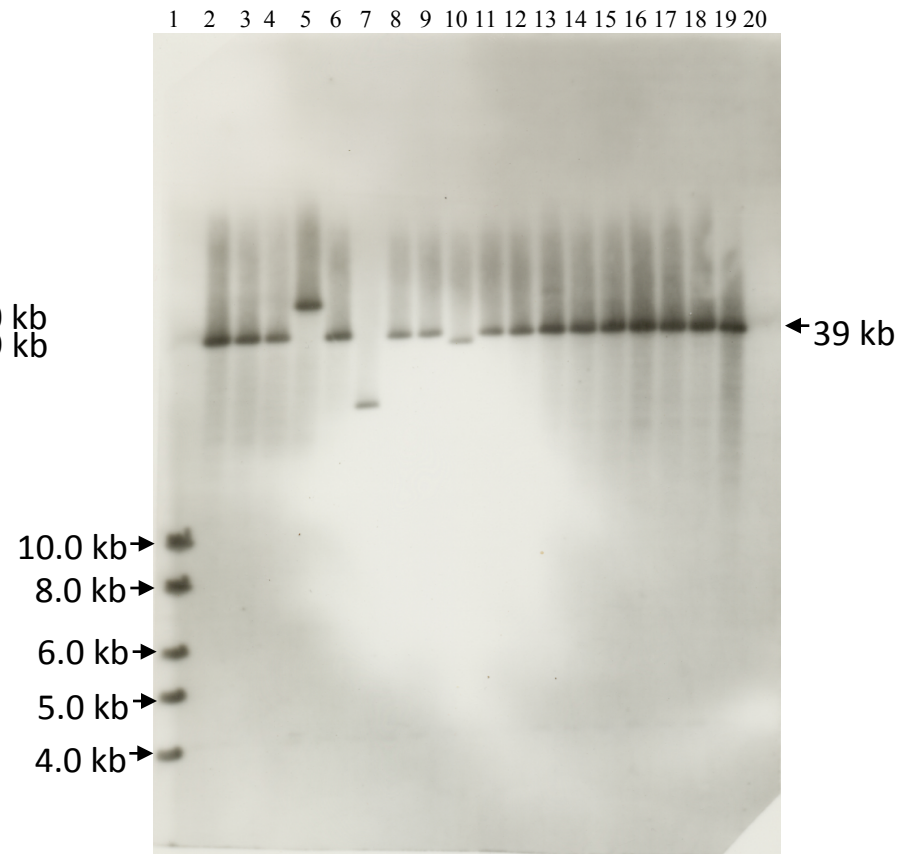

**Figure S2. Southern analysis of duplications of the *URA3* gene in *Ura*<sup>+</sup> sectors.** As described in the text, if loss of *URA3* in the *Ura*<sup>-</sup> sector is a consequence of unequal crossing-over, the *Ura*<sup>+</sup> sector should have two *URA3* insertions. We tested this prediction by treating DNA samples with *Hind*III (which cuts within the *URA3* gene, but not within the *CUP1* repeats) and *Eco*RI (which cuts neither the *URA3* insertion nor the *CUP1* repeats). **A. Southern analysis of *Hind*III-treated samples.** Lane 1 has HyperLadder I (Biolone), and Lane 20 has the HyperLadder VI. The ladder in Lane 20 was visualized by straining with ethidium bromide and has DNA fragments in the size range of 10-48.5 kb. Lanes 2-18 have independently-isolated samples from *Ura*<sup>+</sup> sectors. Lane 19 has DNA from the starting control strain YZ18-10. The gel was hybridized to a *CUP1* probe. With the exception of a cross-hybridizing ribosomal DNA fragment at 6.3 kb, all of the samples show only two strongly-hybridizing fragments as expected for a single *URA3* insertion at the *CUP1* array. In Lanes 5, 7, and 10, alterations in the number of *CUP1* repeats were observed, two deletions and one addition. **B. Southern analysis of *Eco*RI-treated samples.** The lanes were loaded in the same order and with comparable samples as in Fig. S2A. The observed fragment sizes were as expected based on the previous gel.
